## RESEARCH ARTICLE

# The efficacy of different seed priming agents for promoting sorghum germination under salt stress

Xiaofei Chen<sup>1</sup>, Ruidong Zhang<sup>1,2</sup>, Yifan Xing<sup>1</sup>, Bing Jiang<sup>1</sup>, Bang Li<sup>1</sup>, Xiaoxue Xu<sup>1,3</sup>, Yufei Zhou<sup>1\*</sup>

**1** College of Agronomy, Shenyang Agricultural University, Shenyang, Liaoning, China, **2** Institute of Economic Crop, Shanxi Academy of Agricultural Sciences, Fenyang, Shanxi, China, **3** Tongliao Agricultural Technology Extension Station, Tongliao, Inner Mongolia, China

\* [zhouyufei2002@aliyun.com](mailto:zhouyufei2002@aliyun.com), [zhouyufei@syau.edu.cn](mailto:zhouyufei@syau.edu.cn)

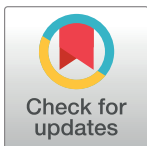

## Abstract

Sorghum [*Sorghum bicolor* (L.) Moench] seed germination is sensitive to salinity, and seed priming is an effective method for alleviating the negative effects of salt stress on seed germination. However, few studies have compared the effects of different priming agents on sorghum germination under salt stress. In this study, we quantified the effects of priming with distilled water (HP), sodium chloride (NaCl), potassium chloride (KCl), calcium chloride (CaCl<sub>2</sub>), and polyethylene glycol (PEG) on sorghum seed germination under 150 mM NaCl stress. The germination potential, germination rate, germination index, vigor index, root length, shoot length, root fresh weight, shoot fresh weight, root dry weight, and shoot dry weight were significantly reduced by salt stress. Different priming treatments alleviated the germination inhibition caused by salt stress to varying degrees, and 50 mM CaCl<sub>2</sub> was the most effective treatment. In addition, the mitigation effect of priming was stronger on root traits than on shoot traits. Mitigation efficacy was closely related to both the type of agent and the concentration of the solution. Principal component analysis showed that all concentrations of CaCl<sub>2</sub> had higher scores and were clearly distinguished from other treatments based on their positive effects on all germination traits. The effects of the other agents varied with concentration. The priming treatments were divided into three categories based on their priming efficacy, and the 50, 100, and 150 mM CaCl<sub>2</sub> treatments were placed in the first category. The 150 mM KCl, 10% PEG, HP, 150 mM NaCl, 30% PEG, and 50 mM KCl treatments were placed in the second category, and the 100 mM NaCl, 100 mM KCl, 20% PEG, and 50 mM NaCl treatments were least effective and were placed in the third category. Choosing appropriate priming agents and methods for future research and applications can ensure that crop seeds germinate healthily under saline conditions.

## OPEN ACCESS

**Citation:** Chen X, Zhang R, Xing Y, Jiang B, Li B, Xu X, et al. (2021) The efficacy of different seed priming agents for promoting sorghum germination under salt stress. PLoS ONE 16(1): e0245505. <https://doi.org/10.1371/journal.pone.0245505>

**Editor:** Saddam Hussain, Department of Agronomy, University of Agriculture, Faisalabad, PAKISTAN

**Received:** August 19, 2020

**Accepted:** December 31, 2020

**Published:** January 19, 2021

**Copyright:** © 2021 Chen et al. This is an open access article distributed under the terms of the [Creative Commons Attribution License](https://creativecommons.org/licenses/by/4.0/), which permits unrestricted use, distribution, and reproduction in any medium, provided the original author and source are credited.

**Data Availability Statement:** All relevant data are within the manuscript and its [Supporting information](#) files.

**Funding:** This research was funded by the China Agriculture Research System (CARS-06).

**Competing interests:** The authors have declared that no competing interests exist.

## Introduction

Seed germination is a critical stage of the plant life cycle. During germination, the dormant seed becomes highly active and eventually becomes a healthy seedling [1,2]. Seed germination begins with water absorption and is accompanied by degradation of macromolecular

substances, repair of genetic materials, and expansion of the embryo and endosperm, eventually leading to rupture of the seed coat and endosperm and the production of a prominent radicle [3,4]. Healthy seed germination strongly influences early seedling establishment and final yield [5]. However, germination is susceptible to environmental stresses such as salt stress [6,7]. Over 900 million hectares, approximately 20% of the world's total agricultural land, are affected by salt, and it has become an increasingly serious problem in agricultural production [8].

Although all stages of plant growth are affected by salt stress, the seed germination stage is the most sensitive [9]. Seed germination is inhibited by high concentrations of sodium and chloride ions, mainly because they reduce the osmotic potential of the surrounding environment, thereby suppressing seed imbibition and embryo growth [1,10,11]. In addition, ion toxicity also destroys macromolecular substances and affects energy utilization and metabolism during germination [12]. Numerous studies have shown that salt stress can significantly reduce seed vigor and inhibit germination and early seedling growth in many species [13–15]. Effective methods for promoting seed germination in saline conditions are therefore needed, and they are especially crucial for crop production on saline-alkali land [12].

At present, seed coating and seed priming are the main two methods for enhancement of sorghum seed germination under salt stress conditions. Seed priming is one of the most frequently used techniques, and is the method mainly employed by farmers [16]. This pre-sowing treatment allows partial hydration of seeds without causing full radicle protrusion. Seed priming usually involves the first two stages of seed germination (imbibition and activation), and it eventually leads to a higher seed germination rate and improves the uniformity of germination [17]. Seed priming technology is used to improve germination under both favorable and unfavorable conditions [18], and its effects may be greater under adverse conditions than under favorable conditions [19–21]. Hydropriming and osmopriming are the two most common priming methods [22]. During hydropriming, seeds are soaked in water, which promotes seed germination to some extent [23]. Many studies have reported that hydropriming is effective in promoting seed germination under salt stress [24–26]. Polyethylene glycol (PEG) is a large molecular weight penetrant with wide commercial application [22], and studies have reported that seed priming with PEG promotes germination under salt stress [27,28]. In addition, ions such as potassium, sodium, and calcium are used for osmopriming through treatment with NaCl, KCl, CaCl<sub>2</sub>, etc. These compounds are relatively inexpensive and easy to obtain [22], and their ability to improve seed germination under salt stress has been reported in several studies [29–31]. Although there are many reports of the beneficial effects of these seed priming methods during salt stress, few studies have investigated whether the above-mentioned agents improve sorghum seed germination under salt stress. Some other priming agents have also been used for this purpose, such as nano-iron oxide [32], salicylic acid, kinetin and gibberellic acid [33]. Furthermore, studies comparing the relative effects of different priming agents on sorghum germination under salt stress have rarely been reported.

Sorghum [*Sorghum bicolor* (L.) Moench] is one of the most important cereal crops in the world following maize, rice, wheat and barley. Although sorghum is highly stress resistant, it is sensitive to salt during germination, and salt exposure can limit early seedling establishment and reduce final yields [34]. The purposes of this study are (1) to clarify the role of different priming agents on sorghum seed germination under salt stress and (2) to determine which priming agent and concentration has the best effect on sorghum germination under salt stress. Our results provide insight into the mitigation of salt stress effects on sorghum germination.

## Materials and methods

### Plant material

Sorghum seeds [*Sorghum bicolor* (L.) Moench] of the Liaoza15 variety were harvested in 2017 and provided by the Liaoning Academy of Agricultural Sciences for use in this study. Preliminary experiments demonstrated that it showed moderate germination sensitivity to 150 mM salt stress. The germination rate of these seeds is above 90% under favorable conditions. All seeds were stored in a 4°C refrigerator for later use.

### Experimental design

The study was conducted in the sorghum physiology laboratory of Shenyang Agricultural University in 2018. Uniform sorghum seeds were selected and surface sterilized with a 5% NaClO solution for 10 min. The seeds were then washed five times with distilled water and surface dried [35]. First, two treatments (NPN, no priming and no stress; NPS, no priming and salt stress) were used to determine the effect of salt stress on sorghum seed germination. Next, sterilized seeds were primed with HP, sodium chloride solutions (NaCl at 50, 100, and 150 mM), potassium chloride solutions (KCl at 50, 100, and 150 mM), calcium chloride solutions (CaCl<sub>2</sub> at 50, 100, and 150 mM), and polyethylene glycol 6000 solutions (PEG 6000 at 10, 20, 30% w/v) for 12 h at 25°C in the dark with continuous gentle stirring. The ratio of seeds to solution was 1:5 (w/v). After priming, the seeds were air dried to their original moisture content (13%, w/w), and unprimed seeds were used as controls (NPS) [36]. For each treatment, seeds were placed into petri dishes with double-layer sterile filter paper, 10 ml of treatment solution (150 mM NaCl) was added, and the seeds were cultivated in a dark growth chamber at 25 ± 1°C and approximately 70% relative humidity for 10 d (days). To maintain a constant treatment solution concentration, the 150 mM NaCl solution in the petri dishes of each treatment was refreshed daily. Each treatment was replicated three times with 50 seeds per dish, and the experiment was arranged in a completely randomized design.

The numbers of germinated seeds were recorded every day. After 10 d of germination, five seedlings were randomly selected from each replicate for measurement of shoot length (SL), shoot fresh weight (SFW), shoot dry weight (SDW), root length (RL), root fresh weight (RFW), and root dry weight (RDW), and the mean was calculated. SL and RL were measured with a ruler. Shoot and root tissues were dried to a constant weight at 80°C in an oven. Fresh and dry weights were measured using analytical balances (Mettler Toledo, Switzerland). The germination rate (GR), germination potential (GP), germination index (GI), and vigor index (VI) were calculated according to the following formulae.

$$GR = \frac{\text{Total number of germinated seeds on day 10}}{\text{Total number of seeds}} \times 100\% \quad (1)$$

$$GP = \frac{\text{Total number of germinated seeds on day 4}}{\text{Total number of seeds}} \times 100\% \quad (2)$$

$$\begin{aligned} GI = & (\text{number of seeds germinated on day 1/1}) \\ & + (\text{number of seeds germinated on day 2/2}) \\ & + \dots \\ & + (\text{number of seeds germinated on day 10/10}) \end{aligned} \quad (3)$$

$$VI = GI \times RFW \quad (4)$$

[37]

Relative values of the above indicators were calculated as the ratio of the treatment value to the control value.

## Statistical analysis

Origin 2018 (*OriginLab*, Massachusetts, USA) was used to generate a heat map of correlation coefficients among germination traits. One-way analysis of variance (ANOVA) and cluster analysis were performed using SPSS 18.0 software (*SPSS Inc.*, Chicago, USA). Cluster analysis classifies all treatments according to their efficacy in promoting germination. Both software packages were used together to calculate principal component analysis scores for each treatment. Duncan's multiple range test was used to assess significant differences among treatments using SPSS 18.0. Different letters indicate significant differences at  $p < 0.05$ .

## Results

### Seed germination traits under salt stress

Seed germination was clearly affected by salt stress in the absence of priming treatment (Table 1). The values of seed germination traits were significantly lower in the salt-stressed NPS treatment than in the unstressed NPN treatment. GP, GR, GI, VI, SL, RL, SFW, RFW, SDW, and RDW were decreased by 38.47%, 19.12%, 43.64%, 86.44%, 56.21%, 63.02%, 45.02%, 75.97%, 38.35%, and 65.32% in NPS compared with NPN, respectively.

### Relative values of seed germination traits under saline conditions

The values of seed germination traits under salt stress in different priming treatments relative to untreated controls are shown in Table 2. All germination traits were higher in the HP treatment than in the unprimed controls, with the exception of SDW. Most germination traits, including RVI and RRL, were higher in the NaCl treatments. No germination traits were lower in the 50KCl and 150KCl treatments, and only GR, SL, SFW, and SDW were lower in the 100KCl treatment. Seed priming with CaCl<sub>2</sub> increased the values of all germination traits, and the relative values of most traits (RGP, RGI, etc.) were higher in the CaCl<sub>2</sub> treatments than in the other treatments. Only a few germination traits (RGR, RSFW, and RSDW) were lower in the PEG treatment group.

### Correlation among germination traits

There were two groups of highly correlated traits, one comprising RGP, RGR, and RGI and the other comprising RVI, RSL, RRL, RSFW, RRFW, RSDW, and RRDW (Fig 1). The

**Table 1. Effects of salt stress on seed germination traits in sorghum.**

| Treatments | GP (%) | GR (%) | GI     | VI     | SL (cm) | RL (cm) | SFW (mg) | RFW (mg) | SDW (mg) | RDW (mg) |
|------------|--------|--------|--------|--------|---------|---------|----------|----------|----------|----------|
| NPN        | 86.67a | 90.67a | 41.22a | 16.30a | 9.91a   | 11.44a  | 82.58a   | 39.54a   | 8.97a    | 2.97a    |
| NPS        | 53.33b | 73.33b | 23.23b | 2.21b  | 4.34b   | 4.23b   | 45.40b   | 9.50b    | 5.53b    | 1.03b    |

Notes: NPN: no priming and no stress; NPS: no priming and salt stress; GR: germination rate; GI: germination index; VI: vigor index; SL: shoot length; RL: root length; SFW: shoot fresh weight; RFW: root fresh weight; SDW: shoot dry weight; RDW: root dry weight. Different letters within a column indicate a significant difference at  $p < 0.05$ .

<https://doi.org/10.1371/journal.pone.0245505.t001>

**Table 2. Relative values of seed germination traits under saline conditions in different priming treatment groups.**

| Treatments           | RGP     | RGR      | RGI     | RVI     | RSL      | RRL     | RSFW     | RRFW       | RSDW  | RRDW    |
|----------------------|---------|----------|---------|---------|----------|---------|----------|------------|-------|---------|
| HP                   | 1.28abc | 1.18ab   | 1.35abc | 2.59d   | 1.29bcde | 1.55bc  | 1.05cde  | 2.23bcdef  | 0.90b | 1.49d   |
| 50NaCl               | 0.81d   | 0.67f    | 0.70e   | 1.88d   | 1.26cdef | 1.43bc  | 1.18abcd | 2.49abcde  | 1.01b | 1.80bcd |
| 100NaCl              | 1.17bc  | 1.09abcd | 1.12cd  | 1.70d   | 0.96ef   | 1.39bc  | 0.82ef   | 1.65fg     | 1.00b | 1.87bcd |
| 150NaCl              | 1.09c   | 1.09abcd | 1.17bcd | 2.78cd  | 1.10def  | 1.50bc  | 0.96def  | 2.13cdefg  | 0.97b | 1.83bcd |
| 50KCl                | 1.06c   | 1.00bcde | 1.13cd  | 2.47d   | 1.36bcd  | 1.46bc  | 1.07bcde | 1.78defg   | 1.07b | 1.87bcd |
| 100KCl               | 1.06c   | 0.93cde  | 1.01d   | 2.20d   | 0.94f    | 1.38bc  | 0.80ef   | 1.75efg    | 0.96b | 1.84bcd |
| 150KCl               | 1.26bc  | 1.11abcd | 1.19bcd | 3.35bcd | 1.23cdef | 1.54bc  | 1.16abcd | 2.33abcdef | 1.16b | 1.82bcd |
| 50CaCl <sub>2</sub>  | 1.51a   | 1.25a    | 1.59a   | 5.37a   | 1.55abc  | 2.20a   | 1.30abc  | 2.96ab     | 1.47a | 2.30b   |
| 100CaCl <sub>2</sub> | 1.38ab  | 1.14abc  | 1.43ab  | 4.33abc | 1.70a    | 2.26a   | 1.38ab   | 2.99a      | 1.46a | 3.13a   |
| 150CaCl <sub>2</sub> | 1.38ab  | 1.14abc  | 1.59a   | 4.79ab  | 1.59ab   | 1.99ab  | 1.39a    | 2.59abc    | 1.52a | 2.14bcd |
| 10%PEG               | 1.06c   | 0.84ef   | 1.01d   | 3.15bcd | 1.23cdef | 1.74abc | 1.14abcd | 2.52abcd   | 1.16b | 2.26bc  |
| 20%PEG               | 1.13c   | 1.00bcde | 1.08cd  | 2.00d   | 1.07def  | 1.35c   | 0.73f    | 1.51g      | 0.85b | 1.52cd  |
| 30%PEG               | 1.30abc | 1.16ab   | 1.24bcd | 2.39d   | 1.22cdef | 1.38bc  | 0.94def  | 1.79defg   | 1.00b | 1.72bcd |

Notes: RGP: relative germination potential; RGR: relative germination rate; RGI: relative germination index; RVI: relative vigor index; RSL: relative shoot length; RRL: relative root length; RSFW: relative shoot fresh weight; RRFW: relative root fresh weight; RSDW: relative shoot dry weight; RRDW: relative root dry weight. A relative value greater than 1 or less than 1 indicates that the trait is higher or lower than in the control. Different letters within a column indicate significant differences at  $p < 0.05$ .

<https://doi.org/10.1371/journal.pone.0245505.t002>

correlations among most germination traits were significant at the  $p < 0.01$  level. RGP was significantly correlated with RVI, RSL, RRL and RSDW, with correlation coefficients of 0.76, 0.58, 0.68, and 0.64, respectively. RGI was highly correlated with RVI, RSL, RRL, and RSDW, with correlation coefficients of 0.81, 0.66, 0.72 and 0.69, respectively. RGR was not significantly correlated with any seedling growth traits (RSL, RRL, etc.), indicating that healthier seedling

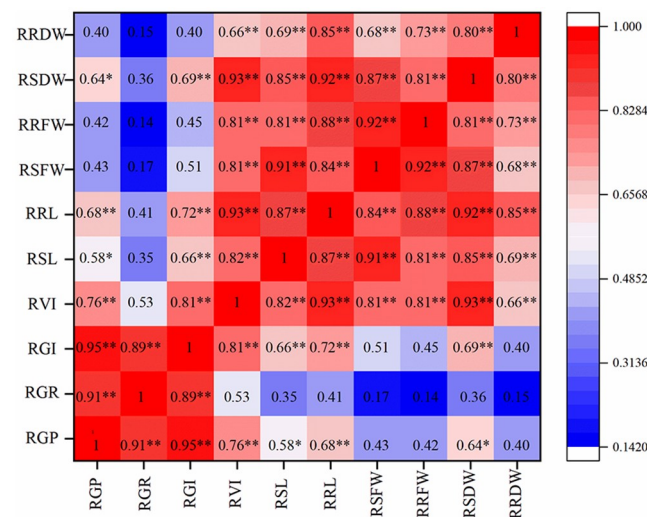

**Fig 1. Heat map of correlations among germination traits under saline conditions.** RGP: relative germination potential; RGR: relative germination rate; RGI: relative germination index; RVI: relative vigor index; RSL: relative shoot length; RRL: relative root length; RSFW: relative shoot fresh weight; RRFW: relative root fresh weight; RSDW: relative shoot dry weight; RRDW: relative root dry weight. A darker red color indicates a larger correlation coefficient, and a darker blue color indicates a smaller correlation coefficient. \* and \*\* indicate significant correlations at  $p < 0.05$  and  $p < 0.01$ , respectively.

<https://doi.org/10.1371/journal.pone.0245505.g001>

growth status induced by seed priming was the result of faster germination (i.e., GP and GI), rather than germination rate.

### Principal component analysis

The effects of the different seed priming treatments on sorghum germination traits under salt stress were evaluated by principal component analysis (PCA). PC1 and PC2 explained 75.77% and 15.58% of the overall variation, respectively (Fig 2). The significant effects of the seed priming treatments on germination traits were clearly distributed along the PC1 axis in the order of  $100\text{CaCl}_2 > 50\text{CaCl}_2 > 150\text{CaCl}_2 > 150\text{KCl} > 10\%\text{PEG} > \text{HP} > 50\text{KCl} > 30\%\text{PEG} > 150\text{NaCl} > 100\text{NaCl} > 50\text{NaCl} > 100\text{KCl} > 20\%\text{PEG}$ . The  $\text{CaCl}_2$  treatments had markedly higher PC1 scores and were clustered on the right of the PC1 axis; the other treatments with lower scores were observed primarily on the left. PCA also showed higher germination traits in  $\text{CaCl}_2$  treatments compared to the other treatments.

The loading matrix of a given principal component reflected the degree of correlation between the germination traits and the principal component. PC1 had large loadings on all germination traits and showed strong positive correlations. PC2 had large loadings on RGP, RGR and RGI with positive correlations but had negative correlations with seedling growth traits (Table 3). This indicated that PC1 reflected the overall germination status, whereas PC2 reflected the opposite correlations between RGP, RGR, RGI and seedling growth traits.

Similar to the results of Table 3, the coefficient matrix of component scores reflects the contribution of germination traits to the principal component score (Table 4). All germination traits had large score coefficients and showed strong positive coefficients, indicating that the higher the score on PC1, the better the effect of the priming treatment on overall germination status of sorghum under salt stress. PC2 had large positive coefficients for RGP, RGR and RGI but negative coefficients for seedling growth traits, indicating that seedling growth traits were not positively correlated with RGP, RGR and RGI, as can also be seen in Table 2. Based on

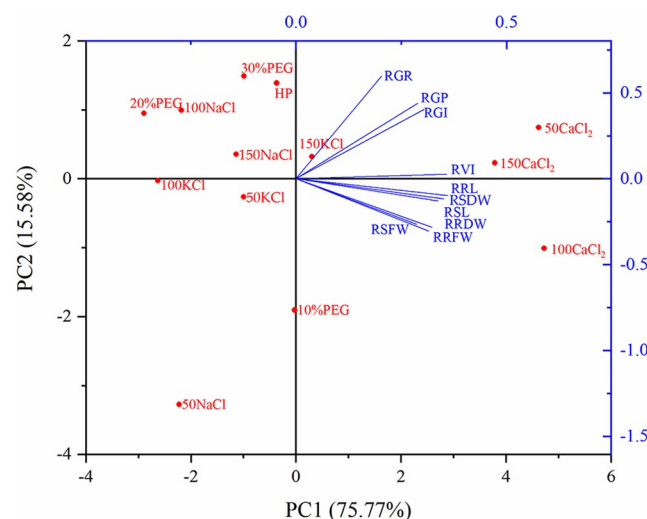

**Fig 2. Principle component analysis of germination traits for different seed priming treatments.** RGP: relative germination potential; RGR: relative germination rate; RGI: relative germination index; RVI: relative vigor index; RSL: relative shoot length; RRL: relative root length; RSFW: relative shoot fresh weight; RRFW: relative root fresh weight; RSDW: relative shoot dry weight; RRDW: relative root dry weight.

<https://doi.org/10.1371/journal.pone.0245505.g002>



**Table 3. Loading matrix for principal components.**

|     | RGP   | RGR   | RGI   | RVI   | RSL    | RRL    | RSFW   | RRFW   | RSDW   | RRDW   |
|-----|-------|-------|-------|-------|--------|--------|--------|--------|--------|--------|
| PC1 | 0.834 | 0.624 | 0.869 | 0.969 | 0.920  | 0.973  | 0.882  | 0.866  | 0.952  | 0.755  |
| PC2 | 0.527 | 0.758 | 0.468 | 0.034 | -0.175 | -0.123 | -0.357 | -0.376 | -0.143 | -0.388 |

Notes: RGP: relative germination potential; RGR: relative germination rate; RGI: relative germination index; RVI: relative vigor index; RSL: relative shoot length; RRL: relative root length; RSFW: relative shoot fresh weight; RRFW: relative root fresh weight; RSDW: relative shoot dry weight; RRDW: relative root dry weight.

<https://doi.org/10.1371/journal.pone.0245505.t003>

**Table 4**, the factor score function formulas for PC1 (Y1) and PC2 (Y2) were as follows:

$$Y1 = 0.11RGP + 0.082RGR + 0.115RGI + 0.128RVI + 0.121RSL + 0.128RRL + 0.116RSFW + 0.114RRFW + 0.126RSDW + 0.1RRDW \quad (5)$$

$$Y2 = 0.338RGP + 0.486RGR + 0.3RGI + 0.022RVI - 0.112RSL - 0.079RRL - 0.229RSFW - 0.242RRFW - 0.092RSDW - 0.249RRDW \quad (6)$$

A single component score is insufficient to make a comprehensive assessment of all germination traits influenced by priming treatments under salt stress. A comprehensive component score (Y) can be obtained from the contributions of the two components by calculating the weighted average, that is  $Y = 0.83Y1 + 0.17Y2$ .

Y1, Y2, and Y for each treatment are shown in **Table 5**. Based on their Y-values, the efficacies of different seed priming treatments in promoting sorghum germination under salt stress were  $50CaCl_2 > 100CaCl_2 > 150CaCl_2 > 150KCl > 10\%PEG > HP > 150NaCl > 30\%PEG > 50KCl > 100NaCl > 100KCl > 20\%PEG > 50NaCl$ .

## Cluster analysis

Cluster analysis was performed based on the Y-values obtained from the principal component analysis, and the 13 priming treatments were divided into three categories using Ward's method of systematic classification [38] (**Fig 3**). The first group comprised the  $50CaCl_2$ ,  $100CaCl_2$ , and  $150CaCl_2$  treatments, which had an optimal effect on seed germination under saline conditions. The second group promoted germination under saline conditions to a lesser extent and comprised the  $150KCl$ ,  $10\%PEG$ ,  $HP$ ,  $150NaCl$ ,  $30\%PEG$  and  $50KCl$  treatments. The third group comprised the  $100NaCl$ ,  $100KCl$ ,  $20\%PEG$ , and  $50NaCl$  treatments, which had a minimal effect on seed germination under salt stress.

**Table 4. Coefficient matrix of component scores.**

|     | RGP   | RGR   | RGI   | RVI   | RSL    | RRL    | RSFW   | RRFW   | RSDW   | RRDW   |
|-----|-------|-------|-------|-------|--------|--------|--------|--------|--------|--------|
| PC1 | 0.110 | 0.082 | 0.115 | 0.128 | 0.121  | 0.128  | 0.116  | 0.114  | 0.126  | 0.100  |
| PC2 | 0.338 | 0.486 | 0.300 | 0.022 | -0.112 | -0.079 | -0.229 | -0.242 | -0.092 | -0.249 |

Notes: RGP: relative germination potential; RGR: relative germination rate; RGI: relative germination index; RVI: relative vigor index; RSL: relative shoot length; RRL: relative root length; RSFW: relative shoot fresh weight; RRFW: relative root fresh weight; RSDW: relative shoot dry weight; RRDW: relative root dry weight.

<https://doi.org/10.1371/journal.pone.0245505.t004>

**Table 5. Comprehensive component scores (Y) and order of priming treatment efficacy under saline conditions.**

| Priming treatments   | Y1   | Y2    | Y    | Order of priming efficacy |
|----------------------|------|-------|------|---------------------------|
| HP                   | 1.72 | -0.04 | 1.42 | 6                         |
| 50NaCl               | 1.53 | -0.82 | 1.13 | 13                        |
| 100NaCl              | 1.46 | -0.07 | 1.20 | 10                        |
| 150NaCl              | 1.68 | -0.21 | 1.36 | 7                         |
| 50KCl                | 1.65 | -0.27 | 1.32 | 9                         |
| 100KCl               | 1.48 | -0.20 | 1.19 | 11                        |
| 150KCl               | 1.87 | -0.26 | 1.51 | 4                         |
| 50CaCl <sub>2</sub>  | 2.51 | -0.36 | 2.02 | 1                         |
| 100CaCl <sub>2</sub> | 2.46 | -0.77 | 1.91 | 2                         |
| 150CaCl <sub>2</sub> | 2.35 | -0.35 | 1.89 | 3                         |
| 10%PEG               | 1.87 | -0.68 | 1.44 | 5                         |
| 20%PEG               | 1.40 | 0.02  | 1.17 | 12                        |
| 30%PEG               | 1.62 | 0.01  | 1.35 | 8                         |

<https://doi.org/10.1371/journal.pone.0245505.t005>

## Discussion

Sorghum growth is easily inhibited by salt stress, especially during the germination stage [37]. In this study, sorghum germination was significantly inhibited by salt stress: germination potential, germination rate, germination index, and vigor index were all reduced, and seedling growth was inhibited (S1 Table). There are various reasons for delayed and repressed seed germination under salt stress. First, salinity reduces the osmotic potential of the external medium, limiting the seedlings' capacity for water absorption and thereby inhibiting cell growth [39]. Second, salt stress may reduce the efficiency of seed reserve mobilization during germination by various mechanisms, such as the perturbation of protein structure [23]. In addition, seed respiration may also be enhanced, thereby reducing the levels of reserve substances available for seedling growth [40].

Seed priming is an effective way to alleviate the inhibition of seed germination and seedling growth by salt stress [30]. In this study, although the effects of different priming agents differed, all promoted the germination of sorghum seeds under salt stress to some extent (S2 Table). Iqbal et al. [41] reported that seed priming with NaCl, KCl, and CaCl<sub>2</sub> alleviated salt stress damage, thereby increasing shoot fresh weight and dry weight in maize. Similarly, Abraha et al. [42] showed that seed priming with 5g/L NaCl significantly improved early seedling growth under salt stress in maize. Likewise, seed priming with PEG-6000 alleviated the adverse effects of salt stress on seed germination and early seedling growth in common vetch [43]. Seed priming with distilled water increased the germination index, root and shoot length, and dry weight and promoted the germination and normal seedling growth of maize under salt stress [44]. These results show that a variety of substances can be used as seed priming agents and can promote seed germination under saline conditions, consistent with the findings of this study.

Priming treatments reduced salt stress damage, and it is interesting that their effects on seed germination potential, germination index, and vigor index were greater than their effects on final germination rate (S2 Table), indicating that priming mainly improved seed vigor rather than the number of germinated seeds under salt stress. Correlation analysis showed that the germination rate was not significantly correlated with seedling growth traits. By contrast, traits (RGP, RGI and RVI) associated with seed vigor were strongly correlated with some seedling growth traits, suggesting that seedling growth was closely related to seed vigor. In other words, seed priming promoted the establishment of strong seedlings under salt stress primarily



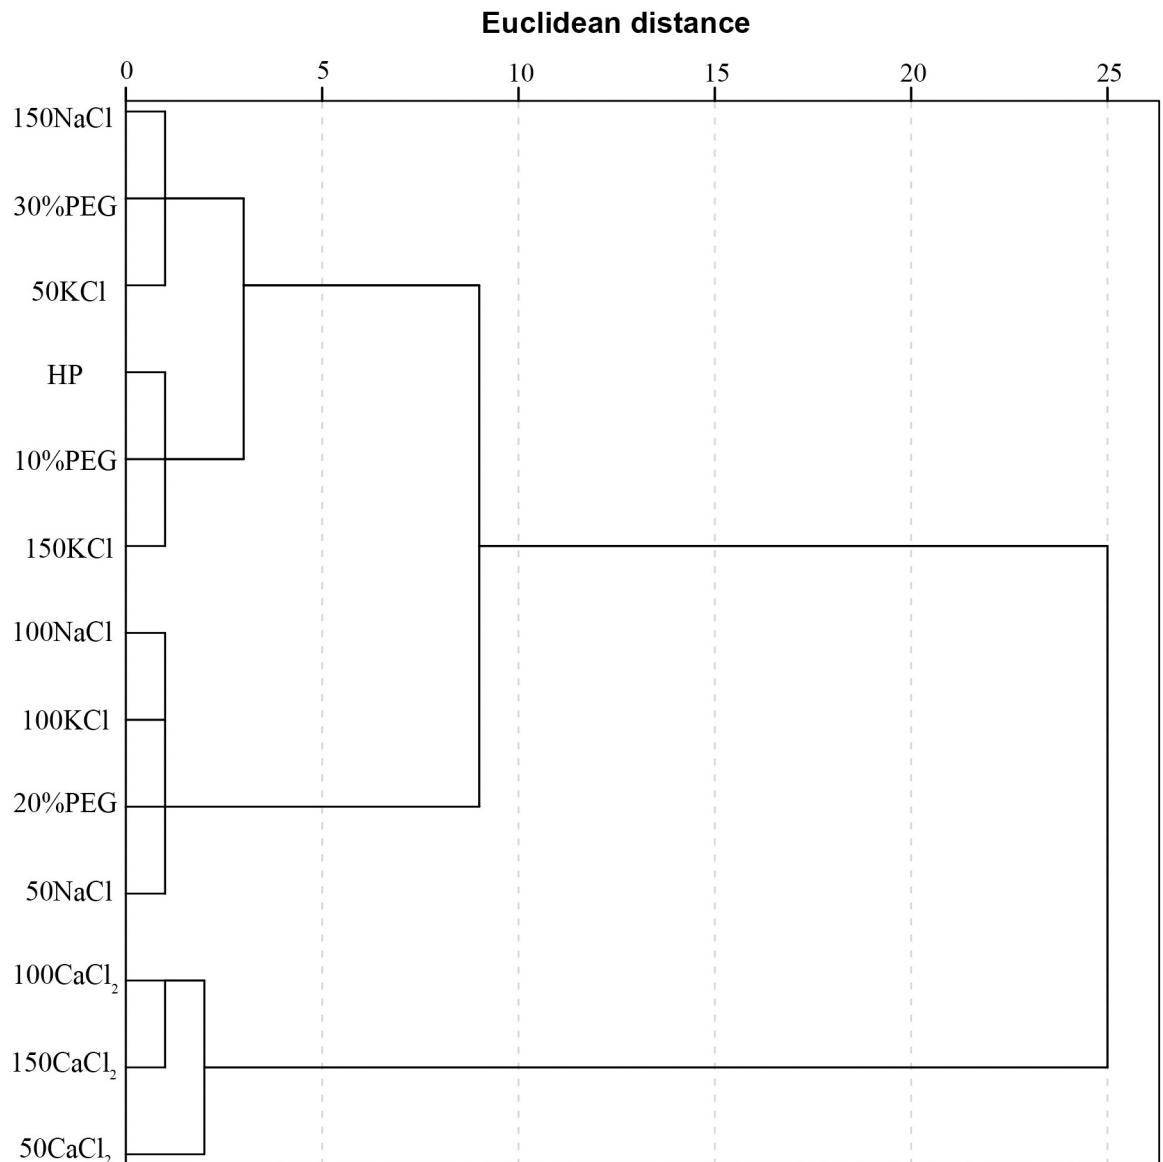

**Fig 3. Dendrogram of 13 seed priming treatments based on Y-values using Ward's method of systematic classification.**

<https://doi.org/10.1371/journal.pone.0245505.g003>

by improving seed vigor. In addition, priming had a greater positive effect on root traits than on shoot traits. This observation is consistent with the data of Farooq et al. [45], Ghobadi et al. [46], Azooz [47], and Hussain et al. [48] and may be due to a priming-triggered metabolic process that occurs before seedling emergence and prepares the seeds for radicle protrusion [49,50]. In addition, seed priming reduces physical barriers of the endosperm during imbibition, repairs membrane damage, improves the growth of immature embryos, and leaches germination inhibitors to promote radicle growth [1,51,52].

Different priming treatments promoted sorghum germination to different extents under salt stress, and principal component analysis clearly indicated that  $\text{CaCl}_2$  priming was superior to other treatments based on its positive effects on germination traits. The priming treatments were divided into three categories by cluster analysis, and  $\text{CaCl}_2$  priming treatments were again classified as the most effective. Mitigation of abiotic stress by seed priming with  $\text{CaCl}_2$  has also

been reported in Farooq et al. [45], Issam et al. [53], and Bismillah et al. [54]. Calcium is one of the main essential nutrients required for plant growth, development, and stress tolerance [55]. Calcium ions play an important role in the regulation of plant metabolism, and free calcium ions inhibit the influx of extracellular sodium ions and maintain the intracellular potassium and sodium ion balance [56], reducing sodium ion toxicity and improving salt tolerance during germination. In addition, calcium signal transduction has a role in plant acclimation to salt stress. When plants are exposed to salt stress, the concentration of intracellular calcium ions increases rapidly [57], and Köster et al. [58] pointed out that calcium ions coordinate the response to salt stress at the cellular and organismal levels. Sodium and potassium ions do not play the same physiological role as second messengers [57]. These effects of calcium ions may explain why calcium chloride priming was the best treatment for sorghum seed germination under salt stress. Jafar et al. [59] reported that although different priming treatments improved the salt tolerance of wheat, priming with  $\text{CaCl}_2$  was the most effective treatment compared with ascorbic acid, salicylic acid, and kinetin. Afzal et al. [60] showed that seed priming with  $\text{CaCl}_2$  was more effective than  $\text{NaCl}$  in improving wheat salt tolerance at the germination stage. In this study, priming with only distilled water also had a positive effect. However, the benefits of primed seeds are reduced by prolonged storage and storage conditions such as temperature, seed moisture content, and seed quality [61,62]. The effects of other treatments differed depending on their solution concentrations, perhaps because their different osmotic potentials led to different imbibition rates and, eventually, different priming effects.

In summary, our conclusions are as follows: (1) Sorghum germination was significantly inhibited by salt stress, and this effect could be alleviated to varying degrees by seed priming with HP,  $\text{NaCl}$ ,  $\text{KCl}$ ,  $\text{CaCl}_2$ , or PEG-6000, and (2) 50 mM  $\text{CaCl}_2$  was the most effective priming treatment for promoting the germination of sorghum seeds under salt stress. Common and inexpensive seed priming agents were used in this study. However, there are many other seed priming agents and methods, and it is helpful to classify different agents and determine which is the best based on their actual effects on seed germination under salt stress. It is worth mentioning that our work was limited to a single sorghum variety germinated and grown *in vitro*. It will therefore be necessary to continue this work with glasshouse or field trials, bearing in mind that different sorghum varieties may respond differently to these treatments. Further research is also necessary to determine the physiological and molecular mechanisms by which  $\text{CaCl}_2$  improves sorghum germination under salt stress.

## Supporting information

**S1 Table. The raw data.** The table matched to [Table 1](#). (XLSX)

**S2 Table. The raw data.** The table matched to [Table 2](#). (XLSX)

## Acknowledgments

We thank the Sorghum Research Institute of Liaoning Academy of Agricultural Sciences for providing experimental materials for this study.

## Author Contributions

**Conceptualization:** Yufei Zhou.

**Data curation:** Xiaofei Chen.

**Formal analysis:** Xiaofei Chen.

**Funding acquisition:** Yufei Zhou.

**Investigation:** Xiaofei Chen.

**Methodology:** Xiaofei Chen, Ruidong Zhang, Yufei Zhou.

**Project administration:** Xiaofei Chen.

**Resources:** Yufei Zhou.

**Supervision:** Ruidong Zhang, Yifan Xing, Bing Jiang, Bang Li, Xiaoxue Xu, Yufei Zhou.

**Validation:** Yufei Zhou.

**Writing – original draft:** Xiaofei Chen.

**Writing – review & editing:** Yufei Zhou.

## References

1. Rajjou L, Duval M, Gallardo K, Catusse J, Bally J, Job C, et al. Seed germination and vigor. *Annual Review of Plant Biology*. 2012; 63(1): 507–533. <https://doi.org/10.1146/annurev-arplant-042811-105550> PMID: 22136565
2. Finch-Savage WE, Leubner-Metzger G. Seed dormancy and the control of germination. *New Phytologist*. 2006; 171(3): 501–523. <https://doi.org/10.1111/j.1469-8137.2006.01787.x> PMID: 16866955
3. Afreen F, Zobayed SMA, Kozai T. Melatonin in *Glycyrrhiza uralensis*: response of plant root to spectral quality of light and UV-B radiation. *Journal of Pineal Research*. 2006; 41(2): 108–115. <https://doi.org/10.1111/j.1600-079X.2006.00337.x> PMID: 16879315
4. Bewley JD. Seed germination and dormancy. *Plant Cell*. 1997; 9(7): 1055–1066. <https://doi.org/10.1105/tpc.9.7.1055> PMID: 12237375
5. Zhu G, An L, Jiao X, Chen X, Zhou G, McLaughlin N. Effects of gibberellic acid on water uptake and germination of sweet sorghum seeds under salinity stress. *Chilean Journal of Agricultural Research*. 2019; 79(3): 415–424.
6. Cesur A, Tabur S. Chromotoxic effects of exogenous hydrogen peroxide (H<sub>2</sub>O<sub>2</sub>) in barley seeds exposed to salt stress. *Acta Physiologiae Plantarum*. 2011; 33: 705–709.
7. Zheng C, Jiang D, Liu F, Li X, Liu W, Jing Q, et al. Exogenous nitric oxide improves seed germination in wheat against mitochondrial oxidative damage induced by high salinity. *Environmental and Experimental Botany*. 2009; 67(1): 222–227.
8. Munns R, Tester M. Mechanisms of salinity tolerance. *Annual Review of Plant Biology*. 2008; 59(1): 651–681. <https://doi.org/10.1146/annurev.arplant.59.032607.092911> PMID: 18444910
9. Cuartero J, Bolarin MC, Asíns MJ, Moreno V. Increasing salt tolerance in the tomato. *Journal of Experimental Botany*. 2006; 57(5): 1045–1058. <https://doi.org/10.1093/jxb/erj102> PMID: 16520333
10. Shao Q, Han N, Ding T, Zhou F, Wang B. SsHKT1;1 is a potassium transporter of the C3 halophyte *Suaeda salsa* that is involved in salt tolerance. *Functional Plant Biology*. 2014; 41(8): 790–802. <https://doi.org/10.1071/FP13265> PMID: 32481033
11. Daszkowska-Golec A. Arabidopsis seed germination under abiotic stress as a concert of action of phytohormones. *Omic*. 2011; 15(11): 763–774. <https://doi.org/10.1089/omi.2011.0082> PMID: 22011341
12. Li J, Zhao C, Zhang M, Yuan F, Chen M. Exogenous melatonin improves seed germination in *Limonium bicolor* under salt stress. *Plant Signaling & Behavior*. 2019; 14: 1–10. <https://doi.org/10.1080/15592324.2019.1659705> PMID: 31460852
13. Bybordi A. The influence of salt stress on seed germination, growth and yield of canola cultivars. *Notulae Botanicae Horti Agrobotanici Cluj-Napoca*. 2010; 38(1): 128–133.
14. Zhang S, Hu J, Zhang Y, Xie X, Knapp A. Seed priming with brassinolide improves lucerne (*Medicago sativa* L.) seed germination and seedling growth in relation to physiological changes under salinity stress. *Australian Journal of Agricultural Research*. 2007; 58(8): 811–815.
15. Duan D, Li W, An P, Liu X. Seed germination and seedling growth of *suaeda salsa* under salt stress. *Annales Botanici Fennici*. 2007; 44: 161–169.

16. Hussain S, Khaliq A, Tanveer M, Matloob A, Hussain HA. Aspirin priming circumvents the salinity-induced effects on wheat emergence and seedling growth by regulating starch metabolism and antioxidant enzyme activities. *Acta Physiologiae Plantarum*. 2018; 40(4): 68.
17. Chen K, Arora R. Priming memory invokes seed stress-tolerance. *Environmental & Experimental Botany*. 2013; 94: 33–45.
18. Jisha KC, Vijayakumari K, Puthur J. Seed priming for abiotic stress tolerance: an overview. *Acta Physiologiae Plantarum*. 2012; 35(5): 1381–1396.
19. Demir I, Mavi K. The effect of priming on seedling emergence of differentially matured watermelon (*Citrullus lanatus* (Thunb.) Matsum and Nakai) seeds. *Scientia Horticulturae*. 2004; 102(4): 467–473.
20. Ashraf M, Foolad M. Pre-sowing seed treatment—a shotgun approach to improve germination, plant growth, and crop yield under saline and non-saline conditions. *Advances in Agronomy*. 2005; 88: 223–271.
21. Chen K, Arora R. Dynamics of the antioxidant system during seed osmopriming, post-priming germination, and seedling establishment in spinach (*Spinacia oleracea*). *Plant Science*. 2011; 180(2): 212–220. <https://doi.org/10.1016/j.plantsci.2010.08.007> PMID: 21421363
22. Paparella S, Araújo S, Rossi G, Wijayasinghe MM, Carbonera D, Balestrazzi A. Seed priming: state of the art and new perspectives. *Plant Cell Reports*. 2015; 34(8): 1–13. <https://doi.org/10.1007/s00299-015-1784-y> PMID: 25812837
23. Ibrahim EA. Seed priming to alleviate salinity stress in germinating seeds. *Journal of Plant Physiology*. 2016; 192: 38–46. <https://doi.org/10.1016/j.jplph.2015.12.011> PMID: 26812088
24. Li J, Yin L, Jongsma MA, Wang CY. Effects of light, hydropriming and abiotic stress on seed germination, and shoot and root growth of pyrethrum (*Tanacetum cinerariifolium*). *Industrial Crops and Products*. 2011; 34(3): 1543–1549.
25. Curtidor CM, Seal C, Papenbrock J. Seed priming improves germination in saline conditions for *Chenopodium quinoa* and *Amaranthus caudatus*. *Journal of Agronomy and Crop Science*. 2017; 204(1): 1–9.
26. Yan M. Hydro-priming increases seed germination and early seedling growth in two cultivars of Napa cabbage (*Brassica rapa* subsp. *pekinensis*) grown under salt stress. *Journal of Horticultural Science and Biotechnology*. 2016; 91(4): 1–6.
27. Zhang X, Guo Q, Shen X. Effects of seed priming on salt tolerance in *Prunella vulgaris* seed germination under saline conditions. *China Journal of Chinese Materia Medica*. 2009; 34(8): 944–947. PMID: 19639771
28. Naglireiter C, Reichenauer TG, Goodman BA, Bolhàr-Nordenkampf HR. Free radical generation in *Pinus sylvestris* and *Larix decidua* seeds primed with polyethylene glycol or potassium salt solutions. *Plant Physiology Biochemistry*. 2005; 43(2): 117–123. <https://doi.org/10.1016/j.plaphy.2005.01.005> PMID: 15820658
29. Farhoudi R, Saeedipour S, Mohammadreza D. The effect of NaCl seed priming on salt tolerance, antioxidant enzyme activity, proline and carbohydrate accumulation of Muskmelon (*Cucumis melo* L.) under saline condition. *Africa Journal of Agricultural Research*. 2011; 6(6): 1363–1370.
30. Jiang XW, Zhang CR, Wang WH, Xu GH, Zhang HY. Seed priming improves seed germination and seedling growth of *Isatis indigotica* Fort. under Salt Stress. *Hortscience*. 2020; 55(5): 647–650.
31. Gholami M, Mokhtarian F, Baninasab B. Seed halopriming improves the germination performance of black seed (*Nigella sativa*) under salinity stress conditions. *Journal of Crop Science and Biotechnology*. 2015; 18(1): 21–26.
32. Maswada HF, Djanaguiraman M, Prasad PVV. Seed treatment with nano-iron (III) oxide enhances germination, seedling growth and salinity tolerance of sorghum. *Journal of Agronomy & Crop Science*. 2018; 204: 577–587.
33. Nimir NEA, Lu S, Zhou G, Guo W, Ma B, Wang Y. Comparative effects of gibberellic acid, kinetin and salicylic acid on emergence, seedling growth and the antioxidant defence system of sweet sorghum (*Sorghum bicolor*) under salinity and temperature stresses. *Crop & Pasture Science*. 2015; 66(2): 145–157.
34. Zhu G, Song CY, Yu LL, Chen XB. Alleviation effects of exogenous growth regulators on seed germination of sweet sorghum under salt stress and its physiological basis. *Acta Agronomica Sinica*. 2018; 44(11): 1713–1724.
35. Abid M, Hakeem A, Shao Y, Liu Y, Zahoor R, Fan Y, et al. Seed osmopriming invokes stress memory against post-germinative drought stress in wheat (*Triticum aestivum* L.). *Environmental and Experimental Botany*. 2017; 145: 12–20.
36. Fercha A, Capriotti AL, Caruso G, Cavaliere C, Gherroucha H, Samperi R, et al. Gel-free proteomics reveal potential biomarkers of priming-induced salt tolerance in durum wheat. *Journal of Proteomics*. 2013; 91: 486–499. <https://doi.org/10.1016/j.jprot.2013.08.010> PMID: 23973468

37. Sun L, Zhou YF, Wang C, Xiao MJ, Tao Y, Xu WJ, et al. Screening and identification of sorghum cultivars for salinity tolerance during germination. *Scientia Agricultura. Sinica*. 2012; 45(9): 1714–1722.
38. Wang J, Wu G, Feng Y, Li J, Piao S. Identification and evaluation of resistance of 33 tobacco varieties (lines) to TMV disease. *Journal of Jilin Agricultural University*. 2016; 38(6): 656–662.
39. Migahid MM, Elghobashy RM, Bidak LM, Amin AW. Priming of *silybum marianum* (L.) gaertn seeds with H<sub>2</sub>O<sub>2</sub> and magnetic field ameliorates seawater stress. *Heliyon*. 2019; 5(6): e01886. <https://doi.org/10.1016/j.heliyon.2019.e01886> PMID: 31304408
40. Chen K, Arora R. Dynamics of the antioxidant system during seed osmopriming, post-priming germination and seedling establishment in spinach (*Spinacia oleracea*). *Plant Science*. 2011; 180(2): 212–220. <https://doi.org/10.1016/j.plantsci.2010.08.007> PMID: 21421363
41. Iqbal M, Ashraf M, Jamil A, Shafiq-ur-Rehman. Does seed priming induce changes in the levels of some endogenous plant hormones in hexaploid wheat plants under salt stress. *Journal of Integrative Plant Biology*. 2006; 48(2): 181–189.
42. Tsegay BA, Yohannes G. The role of seed priming in improving seedling growth of maize (*Zea mays* L.) under salt stress at field conditions. *Agricultural Sciences*. 2013; 4(12): 666–672.
43. Aydinoglu B, Shabani A, Safavi SM. Impact of priming on seed germination, seedling growth and gene expression in common vetch under salinity stress. *Cellular and Molecular Biology*. 2019; 65(3): 18–24. PMID: 30942152
44. Li J, Yin LY, Jongsma MA, Wang CY. Effects of light, hydropriming and abiotic stress on seed germination, and shoot and root growth of pyrethrum (*Tanacetum cinerariifolium*). *Industrial Crops and Products*. 2011; 34(3):1543–1549.
45. Farooq S, Hussain M, Jabran K, Hassan W, Rizwan MS, Yasir TA. Osmopriming with CaCl<sub>2</sub> improves wheat (*Triticum aestivum* L.) production under water-limited environments. *Environmental Science and Pollution Research*. 2017; 24(5): 1–12. <https://doi.org/10.1007/s11356-017-8957-x> PMID: 28391467
46. Ghobadi M, Abnavi MS, Honarmand SJ, Ghobadi ME, Mohammadi GR. Effect of hormonal priming (GA3) and osmopriming on behavior of seed germination in wheat (*Triticum aestivum* L.). *Journal of Agricultural Science*. 2012; 4(9): 244–250.
47. Azooz MM. Salt Stress Mitigation by Seed Priming with Salicylic Acid in Two Faba Bean Genotypes Differing in Salt Tolerance. *International Journal of Agriculture and Biology*. 2009; 11(4): 343–350.
48. Hussain S, Khaliq A, Tanveer M, Matloob A, Hussain HA. Aspirin priming circumvents the salinity-induced effects on wheat emergence and seedling growth by regulating starch metabolism and antioxidant enzyme activities. *Acta Physiologiae Plantarum*. 2018; 40(4): 1–12.
49. Farooq M, Basra SMA, Khan MB. Seed priming improves growth of nursery seedlings and yield of transplanted rice. *Archives of Agronomy and Soil Science*. 2007; 53(3): 315–326.
50. Farooq M, Basra SMA, Rehman H, Ahmad N, Saleem BA. Osmopriming improves the germination and early seedling growth of melons (*Cucumis melo* L.). *Pakistan Journal of Agricultural Sciences*. 2007; 44, 529–536.
51. Kibinza S, Bazin J, Bailly C, Farrant JM, Corbineau F, El-Maarouf-Bouteau H. Catalase is a key enzyme in seed recovery from ageing during priming. *Plant Science*. 2011; 181(3): 309–315. <https://doi.org/10.1016/j.plantsci.2011.06.003> PMID: 21763542
52. Bewley JD, Bradford KJ, Hilhorst HWM, Nonogaki H. Seeds: Physiology of development, germination and dormancy (3rd edition). *Seed Science Research*. 2013; 23(4): 289.
53. Issam N, Kawther M, Haythem M, Moez J. Effects of CaCl<sub>2</sub> pretreatment on antioxidant enzyme and leaf lipid content of faba bean (*Vicia faba* L.) seedlings under cadmium stress. *Plant Growth Regulation*. 2012; 68(1): 37–47.
54. Khan MB, Hussain M, Raza A, Farooq S, Jabran K. Seed priming with CaCl<sub>2</sub> and ridge planting for improved drought resistance in maize. *Turkish Journal of Agriculture and Forestry*. 2015; 39(2): 193–203.
55. Liu W, Yuan X, Zhang Y, Xuan Y, Yan Y. Effects of salt stress and exogenous Ca<sup>2+</sup> on Na<sup>+</sup> compartmentalization, ion pump activities of tonoplast and plasma membrane in *Nitraria tangutorum* Bobr. *Acta Physiologiae Plantarum*. 2014; 36(8): 2183–2193.
56. Anil VS, Rajkumar P, Kumar P, Mathew MK. A plant Ca<sup>2+</sup> pump, ACA2, relieves salt hypersensitivity in yeast. Modulation of cytosolic calcium signature and activation of adaptive Na<sup>+</sup> homeostasis. *Journal of Biological Chemistry*. 2008; 283(6): 3497–3506. <https://doi.org/10.1074/jbc.M700766200> PMID: 18073213
57. Manishankar P, Wang N, Köster P, Alatar AA, Kudla J. Calcium signaling during salt stress and in the regulation of ion homeostasis. *Journal of Experimental Botany*. 2018; 69(17): 4215–4226. <https://doi.org/10.1093/jxb/ery201> PMID: 29800460
58. Köster P, Wallrad L, Edel KH, Faisal M, Alatar AA, Kudla J. The battle of two ions: Ca<sup>2+</sup> signalling against Na<sup>+</sup> stress. *Plant Biology*. 2018; 21: 39–48. <https://doi.org/10.1111/plb.12704> PMID: 29411929

59. Jafar MZ, Farooq M, Cheema MA, Afzal I, Basra SMA, Wahid MA, et al. Improving the performance of wheat by seed priming under saline conditions. *Journal of Agronomy & Crop Science*. 2012; 198(1): 38–45.
60. Afzal I, Rauf S, Rauf SMA, Murtaza G. Halopriming improves vigor, metabolism of reserves and ionic contents in wheat seedlings under salt stress. *Plant Soil and Environment*. 2008; 54(9): 382–388.
61. Hussain S, Zheng M, Khan F, Khaliq A, Fahad S, Peng S, et al. Benefits of rice seed priming are offset permanently by prolonged storage and the storage conditions. *Scientific Reports*. 2015; 5: 8101. <https://doi.org/10.1038/srep08101> PMID: 25631923
62. Rajjou L, Debeaujon I. Seed longevity: survival and maintenance of high germination ability of dry seeds. *Comptes Rendus Biologies*. 2008; 331(10): 796–805. <https://doi.org/10.1016/j.crvi.2008.07.021> PMID: 18926494
