# Supplementary material for: The efficacy of different seed priming agents for promoting sorghum germination under salt stress
Source: PLoS One. 2021 Jan 19;16(1):e0245505. doi: 10.1371/journal.pone.0245505 (PMC7815140; doi:10.1371/journal.pone.0245505)
Supplement: S1 Table — The table matched to Table 1. (XLSX) [file pone.0245505.s001.xlsx]

## Sheet: Sheet1
	GP			GR			GI			VI			SL			RL			SFW			RFW			SDW			RDW
	Mean	Standard errors		Mean	Standard errors		Mean	Standard errors		Mean	Standard errors		Mean	Standard errors		Mean	Standard errors		Mean	Standard errors		Mean	Standard errors		Mean	Standard errors		Mean	Standard errors
NPN	86.6667	8.3267	a	90.6667	9.2376	a	41.2177	3.031	a	16.2975	1.1985	a	9.91	2.216	a	11.44	3.0956	a	82.58	10.33	a	39.54	7.31	a	8.97	3.49	a	2.97	0.57	a
NPS	53.3333	12.2202	b	73.3333	6.9282	b	23.2282	4.7997	b	2.2067	0.456	b	4.34	1.2239	b	4.23	0.6017	b	45.4	14.57	b	9.5	2.04	b	5.53	1.1	b	1.03	0.28	b
